# Supplementary material for: Magneto-fluorescent nanoparticles with high-intensity NIR emission, T1- and T2-weighted MR for multimodal specific tumor imaging
Source: Royal Society of Chemistry journal article supplement (doi:10.1039/c5tb00155b), 2015-01-01
Supplement: c5tb00155b1.pdf [file c5tb00155b1.pdf]

## Supporting Information

# Magneto-Fluorescent Nanoparticles with High-Intensity NIR Emission, $T_1$ and $T_2$ Weighted MR for Multimodal Specific Tumor Imaging

Guannan Wang,<sup>ac#</sup> Xuanjun Zhang,<sup>b#</sup> Yaxu Liu,<sup>a</sup> Zhangjun Hu,<sup>c</sup> Xifan Mei,<sup>a\*</sup> Kajsa Uvdal<sup>\*c</sup>

*#These two authors contributed equally to this work.*

*<sup>a</sup>College of Pharmacy & the Key Laboratory for Medical Tissue Engineering of Liaoning Province, Liaoning Medical University, Jinzhou, 121001, China. E-mail: [meixifan1971@163.com](mailto:meixifan1971@163.com); Fax: +86-416-4673162; Tel: +86-416-4673162*

*<sup>b</sup>Faculty of Health Sciences, University of Macau, Avenida da Universidade, Taipa, Macau, China*

*<sup>c</sup>Division of Molecular Surface Physics & Nanoscience, Department of Physics, Chemistry, and Biology, Linköping University, Linköping 58183, Sweden. E-mail: [kajsa@ifm.liu.se](mailto:kajsa@ifm.liu.se); Fax: +46 13 28 8969; Tel: +46 13281208*

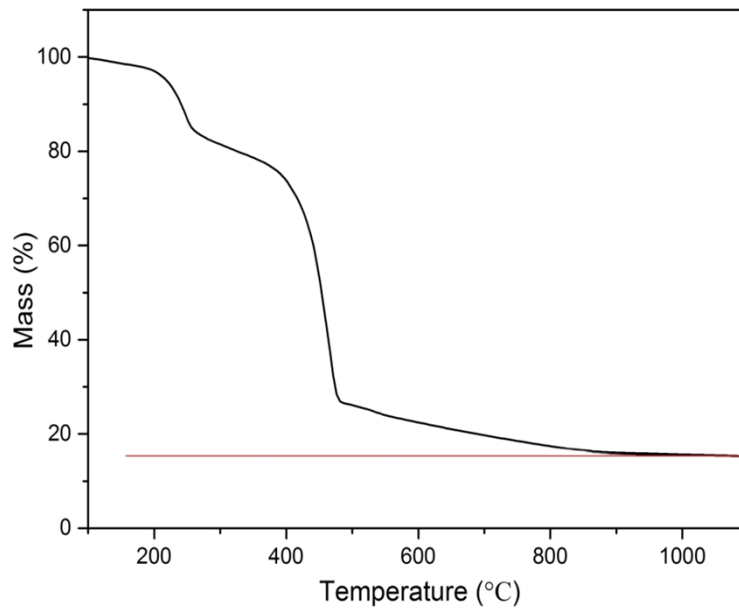

**Figure S1.** The TGA of FMNPs

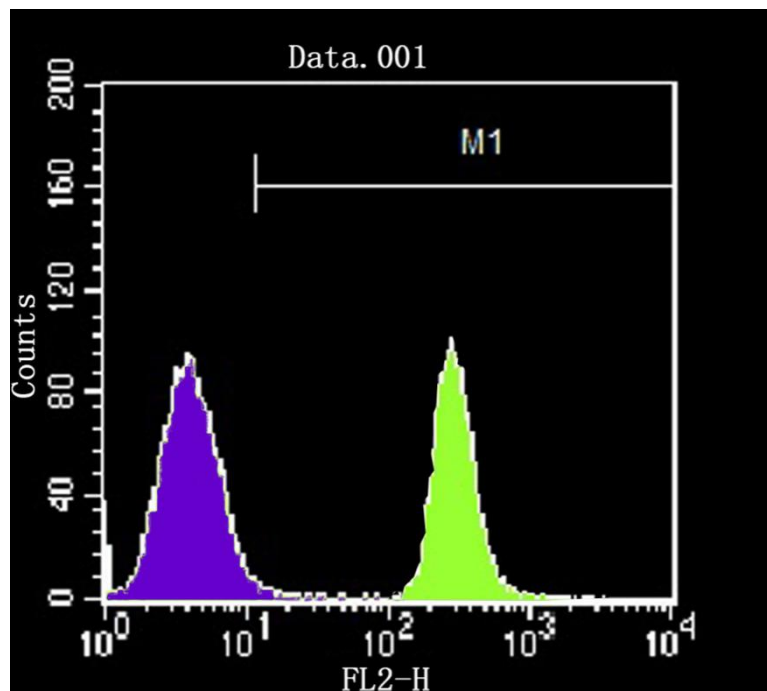

**Figure S2.** Flow cytometry histograms of pure A549 cancer cells (Blue) and the cells after one hour incubation with the FMNPs (green) suspension at 0.5 mg/mL.
